# Supplementary material for: Long-term outcomes of esophageal and gastric cancer patients with cardiovascular and metabolic diseases: A two-center propensity score-matched cohort study
Source: PubMed Central journal article supplement (PMC10561076; doi:10.2478/jtim-2023-0112), 2023-09-02
Supplement: jtim-2023-0112_sm.pdf [file jtim-2023-0112_sm.pdf]

**Supplementary Table 1: Constitution of CVMD in esophageal and gastric cancer patients**

| Characteristics        | Constitution of CVMD in esophageal cancer patients ( <i>n</i> = 1205) | Constitution of CVMD in gastric cancer patients ( <i>n</i> = 869) |
|------------------------|-----------------------------------------------------------------------|-------------------------------------------------------------------|
| Presence of CVMD       |                                                                       |                                                                   |
| No                     | 794 (65.9)                                                            | 571 (65.7)                                                        |
| Yes                    | 411 (34.1)                                                            | 298 (34.3)                                                        |
| Number of CVMDs        |                                                                       |                                                                   |
| 0                      | 794 (65.9)                                                            | 571 (65.7)                                                        |
| 1                      | 293 (24.3)                                                            | 215 (24.7)                                                        |
| 2                      | 99 (8.2)                                                              | 65 (7.5)                                                          |
| > 2                    | 19 (1.6)                                                              | 18 (2.1)                                                          |
| Hypertension           |                                                                       |                                                                   |
| No                     | 932 (77.3)                                                            | 656 (75.5)                                                        |
| Yes                    | 273 (22.7)                                                            | 213 (24.5)                                                        |
| Diabetes               |                                                                       |                                                                   |
| No                     | 1107 (91.9)                                                           | 810 (93.2)                                                        |
| Yes                    | 98 (8.1)                                                              | 59 (6.8)                                                          |
| Ischemic heart disease |                                                                       |                                                                   |
| No                     | 1109 (92.0)                                                           | 806 (92.8)                                                        |
| Yes                    | 96 (8.0)                                                              | 63 (7.2)                                                          |
| Stroke                 |                                                                       |                                                                   |
| No                     | 1122 (93.1)                                                           | 804 (92.5)                                                        |
| Yes                    | 83 (6.9)                                                              | 65 (7.5)                                                          |

Data are presented as *n* (%). CVMDs: cardiovascular and metabolic diseases.

**Supplementary Table 2: Association between clinical features and hypertension in esophageal cancer patients**

| Characteristics             | Patients without hypertension ( <i>n</i> = 932) | Patients with hypertension ( <i>n</i> = 273) | <i>P</i> value |
|-----------------------------|-------------------------------------------------|----------------------------------------------|----------------|
| Sex                         |                                                 |                                              | 0.005          |
| Male                        | 587 (63.0)                                      | 146 (53.5)                                   |                |
| Female                      | 345 (37.0)                                      | 127 (46.5)                                   |                |
| Age                         |                                                 |                                              | 0.004          |
| ≤ 60 years                  | 287 (30.8)                                      | 56 (20.5)                                    |                |
| 60–75 years                 | 511 (54.8)                                      | 169 (61.9)                                   |                |
| ≥ 75 years                  | 134 (14.4)                                      | 48 (17.6)                                    |                |
| Smoking history             |                                                 |                                              | 0.001          |
| No                          | 602 (64.6)                                      | 206 (75.5)                                   |                |
| Yes                         | 330 (35.4)                                      | 67 (24.5)                                    |                |
| Drinking history            |                                                 |                                              | 0.357          |
| No                          | 799 (85.7)                                      | 240 (87.9)                                   |                |
| Yes                         | 133 (14.3)                                      | 33 (12.1)                                    |                |
| Family history of tumor     |                                                 |                                              | 0.112          |
| No                          | 679 (72.9)                                      | 212 (77.7)                                   |                |
| Yes                         | 253 (27.1)                                      | 61 (22.3)                                    |                |
| Recurrence during follow-up |                                                 |                                              | 0.602          |
| No                          | 851 (91.3)                                      | 252 (92.3)                                   |                |
| Yes                         | 81 (8.7)                                        | 21 (7.7)                                     |                |
| Lymph node metastasis       |                                                 |                                              | 0.483          |
| No                          | 673 (72.2)                                      | 203 (74.4)                                   |                |
| Yes                         | 259 (27.8)                                      | 70 (25.6)                                    |                |
| Distant metastasis          |                                                 |                                              | 0.266          |
| No                          | 778 (83.5)                                      | 220 (80.6)                                   |                |
| Yes                         | 154 (16.5)                                      | 53 (19.4)                                    |                |
| Tumor stage                 |                                                 |                                              | 0.584          |
| I                           | 398 (42.7)                                      | 116 (42.5)                                   |                |
| II                          | 231 (24.8)                                      | 59 (21.6)                                    |                |

**Supplementary Table 2: Association between clinical features and hypertension in esophageal cancer patients**

| Characteristics            | Patients without hypertension<br>( <i>n</i> = 932) | Patients with hypertension<br>( <i>n</i> = 273) | <i>P</i> value |
|----------------------------|----------------------------------------------------|-------------------------------------------------|----------------|
| III                        | 149 (16.0)                                         | 45 (16.5)                                       |                |
| IV                         | 154 (16.5)                                         | 53 (19.4)                                       |                |
| Tumor differentiation      |                                                    |                                                 | 0.385          |
| Well differentiated        | 438 (47.0)                                         | 117 (42.9)                                      |                |
| Moderately differentiated  | 337 (36.2)                                         | 102 (37.4)                                      |                |
| Poorly differentiated      | 157 (16.8)                                         | 54 (19.7)                                       |                |
| Treatment regimen          |                                                    |                                                 | 0.277          |
| Without chemo-radiotherapy | 560 (60.1)                                         | 154 (56.4)                                      |                |
| With chemo-radiotherapy    | 372 (39.9)                                         | 119 (43.6)                                      |                |

Data are presented as *n* (%).**Supplementary Table 3: Association between clinical features and hypertension in gastric cancer patients**

| Characteristics             | Patients without hypertension<br>( <i>n</i> = 656) | Patients with hypertension<br>( <i>n</i> = 213) | <i>P</i> value |
|-----------------------------|----------------------------------------------------|-------------------------------------------------|----------------|
| Sex                         |                                                    |                                                 | 0.055          |
| Male                        | 502 (76.5)                                         | 149 (70.0)                                      |                |
| Female                      | 154 (23.5)                                         | 64 (30.0)                                       |                |
| Age (years)                 |                                                    |                                                 | <0.001         |
| ≤ 60                        | 317 (48.3)                                         | 54 (25.4)                                       |                |
| 60–75                       | 275 (41.9)                                         | 124 (58.2)                                      |                |
| ≥ 75                        | 64 (9.8)                                           | 35 (16.4)                                       |                |
| Smoking history             |                                                    |                                                 | 0.678          |
| No                          | 423 (64.5)                                         | 134 (62.9)                                      |                |
| Yes                         | 233 (35.5)                                         | 79 (37.1)                                       |                |
| Drinking history            |                                                    |                                                 | 0.219          |
| No                          | 559 (85.2)                                         | 174 (81.7)                                      |                |
| Yes                         | 97 (14.8)                                          | 39 (18.3)                                       |                |
| Family history of tumor     |                                                    |                                                 | 0.221          |
| No                          | 487 (74.2)                                         | 167 (78.4)                                      |                |
| Yes                         | 169 (25.8)                                         | 46 (21.6)                                       |                |
| Recurrence during follow-up |                                                    |                                                 | 0.362          |
| No                          | 607 (92.5)                                         | 201 (94.4)                                      |                |
| Yes                         | 49 (7.5)                                           | 12 (5.6)                                        |                |
| Lymph node metastasis       |                                                    |                                                 | 0.028          |
| No                          | 319 (48.6)                                         | 122 (57.3)                                      |                |
| Yes                         | 337 (51.4)                                         | 91 (42.7)                                       |                |
| Distant metastasis          |                                                    |                                                 | 0.955          |
| No                          | 638 (97.3)                                         | 207 (97.2)                                      |                |
| Yes                         | 18 (2.7)                                           | 6 (2.8)                                         |                |
| Tumor stage                 |                                                    |                                                 | 0.073          |
| I                           | 135 (20.6)                                         | 57 (26.8)                                       |                |
| II                          | 265 (40.4)                                         | 66 (31.0)                                       |                |
| III                         | 238 (36.3)                                         | 84 (39.4)                                       |                |
| IV                          | 18 (2.7)                                           | 6 (2.8)                                         |                |
| Tumor differentiation       |                                                    |                                                 | <0.001         |
| Well differentiated         | 80 (12.2)                                          | 39 (18.3)                                       |                |
| Moderately differentiated   | 321 (48.9)                                         | 124 (58.2)                                      |                |
| Poorly differentiated       | 255 (38.9)                                         | 50 (23.5)                                       |                |
| Treatment regimen           |                                                    |                                                 | 0.086          |
| Without chemo-radiotherapy  | 526 (80.2)                                         | 159 (74.6)                                      |                |
| With chemo-radiotherapy     | 130 (19.8)                                         | 54 (25.4)                                       |                |

Data are presented as *n* (%).

**Supplementary Table 4: Association between clinical features and diabetes in esophageal cancer patients**

| Characteristics             | Patients without diabetes<br>( <i>n</i> = 1107) | Patients with diabetes<br>( <i>n</i> = 98) | <i>P</i> value |
|-----------------------------|-------------------------------------------------|--------------------------------------------|----------------|
| Sex                         |                                                 |                                            | 0.153          |
| Male                        | 680 (61.4)                                      | 53 (54.1)                                  |                |
| Female                      | 427 (38.6)                                      | 45 (45.9)                                  |                |
| Age                         |                                                 |                                            | 0.069          |
| ≤ 60 years                  | 325 (29.4)                                      | 18 (18.4)                                  |                |
| 60–75 years                 | 617 (55.7)                                      | 63 (64.3)                                  |                |
| ≥ 75 years                  | 165 (14.9)                                      | 17 (17.3)                                  |                |
| Smoking history             |                                                 |                                            | 0.037          |
| No                          | 733 (66.2)                                      | 75 (76.5)                                  |                |
| Yes                         | 374 (33.8)                                      | 23 (23.5)                                  |                |
| Drinking history            |                                                 |                                            | 0.878          |
| No                          | 954 (86.2)                                      | 85 (86.7)                                  |                |
| Yes                         | 153 (13.8)                                      | 13 (13.3)                                  |                |
| Family history of tumor     |                                                 |                                            | 0.070          |
| No                          | 811 (73.3)                                      | 80 (81.6)                                  |                |
| Yes                         | 296 (26.7)                                      | 18 (18.4)                                  |                |
| Recurrence during follow-up |                                                 |                                            | 0.790          |
| No                          | 1014 (91.6)                                     | 89 (90.8)                                  |                |
| Yes                         | 93 (8.4)                                        | 9 (9.2)                                    |                |
| Lymph node metastasis       |                                                 |                                            | 0.678          |
| No                          | 803 (72.5)                                      | 73 (74.5)                                  |                |
| Yes                         | 304 (27.5)                                      | 25 (25.5)                                  |                |
| Distant metastasis          |                                                 |                                            | 0.545          |
| No                          | 919 (83.0)                                      | 79 (80.6)                                  |                |
| Yes                         | 188 (17.0)                                      | 19 (19.4)                                  |                |
| Tumor stage                 |                                                 |                                            | 0.484          |
| I                           | 468 (42.3)                                      | 46 (47.0)                                  |                |
| II                          | 268 (24.2)                                      | 22 (22.4)                                  |                |
| III                         | 183 (16.5)                                      | 11 (11.2)                                  |                |
| IV                          | 188 (17.0)                                      | 19 (19.4)                                  |                |
| Tumor differentiation       |                                                 |                                            | 0.873          |
| Well differentiated         | 512 (46.3)                                      | 43 (43.9)                                  |                |
| Moderately differentiated   | 401 (36.2)                                      | 38 (38.8)                                  |                |
| Poorly differentiated       | 194 (17.5)                                      | 17 (17.3)                                  |                |
| Treatment regimen           |                                                 |                                            | 0.052          |
| Without chemo-radiotherapy  | 665 (60.1)                                      | 49 (50.0)                                  |                |
| With chemo-radiotherapy     | 442 (39.9)                                      | 49 (50.0)                                  |                |

Data are presented as *n* (%).**Supplementary Table 5: Association between clinical features and diabetes in gastric cancer patients**

| Characteristics  | Patients without diabetes<br>( <i>n</i> = 810) | Patients with diabetes<br>( <i>n</i> = 59) | <i>P</i> value |
|------------------|------------------------------------------------|--------------------------------------------|----------------|
| Sex              |                                                |                                            | 0.025          |
| Male             | 614 (75.8)                                     | 37 (62.7)                                  |                |
| Female           | 196 (24.2)                                     | 22 (37.3)                                  |                |
| Age              |                                                |                                            | 0.034          |
| ≤ 60 years       | 355 (43.8)                                     | 16 (27.1)                                  |                |
| 60–75 years      | 363 (44.8)                                     | 36 (61)                                    |                |
| ≥ 75 years       | 92 (11.4)                                      | 7 (11.9)                                   |                |
| Smoking history  |                                                |                                            | 0.283          |
| No               | 523 (64.6)                                     | 34 (57.6)                                  |                |
| Yes              | 287 (35.4)                                     | 25 (42.4)                                  |                |
| Drinking history |                                                |                                            | 0.931          |
| No               | 683 (84.3)                                     | 50 (84.7)                                  |                |
| Yes              | 127 (15.7)                                     | 9 (15.3)                                   |                |

**Supplementary Table 5: Association between clinical features and diabetes in gastric cancer patients**

| Characteristics             | Patients without diabetes<br>(n = 810) | Patients with diabetes<br>(n = 59) | P value |
|-----------------------------|----------------------------------------|------------------------------------|---------|
| Family history of tumor     |                                        |                                    | 0.288   |
| No                          | 613 (75.7)                             | 41 (69.5)                          |         |
| Yes                         | 197 (24.3)                             | 18 (30.5)                          |         |
| Recurrence during follow-up |                                        |                                    | 0.115   |
| No                          | 750 (92.6)                             | 58 (98.3)                          |         |
| Yes                         | 60 (7.4)                               | 1 (1.7)                            |         |
| Lymph node metastasis       |                                        |                                    | 0.274   |
| No                          | 407 (50.2)                             | 34 (57.6)                          |         |
| Yes                         | 403 (49.8)                             | 25 (42.4)                          |         |
| Distant metastasis          |                                        |                                    | 1.000   |
| No                          | 787 (97.2)                             | 58 (98.3)                          |         |
| Yes                         | 23 (2.8)                               | 1 (1.7)                            |         |
| Tumor stage                 |                                        |                                    | 0.771   |
| I                           | 176 (21.7)                             | 16 (27.1)                          |         |
| II                          | 310 (38.3)                             | 21 (35.6)                          |         |
| III                         | 301 (37.2)                             | 21 (35.6)                          |         |
| IV                          | 23 (2.8)                               | 1 (1.7)                            |         |
| Tumor differentiation       |                                        |                                    | 0.059   |
| Well differentiated         | 105 (13.0)                             | 14 (23.7)                          |         |
| Moderately differentiated   | 420 (51.9)                             | 25 (42.4)                          |         |
| Poorly differentiated       | 285 (35.2)                             | 20 (33.9)                          |         |
| Treatment regimen           |                                        |                                    | 0.867   |
| Without chemo-radiotherapy  | 639 (78.9)                             | 46 (78.0)                          |         |
| With chemo-radiotherapy     | 171 (21.1)                             | 13 (22.0)                          |         |

Data are presented as n (%).

**Supplementary Table 6: Association between clinical features and stroke in esophageal cancer patients**

| Characteristics             | Patients without stroke<br>(n = 1122) | Patients with stroke<br>(n = 83) | P value |
|-----------------------------|---------------------------------------|----------------------------------|---------|
| Sex                         |                                       |                                  | 0.725   |
| Male                        | 681 (60.7)                            | 52 (62.7)                        |         |
| Female                      | 441 (39.3)                            | 31 (37.3)                        |         |
| Age                         |                                       |                                  | 0.003   |
| ≤ 60 years                  | 332 (29.6)                            | 11 (13.3)                        |         |
| 60–75 years                 | 627 (55.9)                            | 53 (63.9)                        |         |
| ≥ 75 years                  | 163 (14.5)                            | 19 (22.9)                        |         |
| Smoking history             |                                       |                                  | 0.570   |
| No                          | 750 (66.8)                            | 58 (69.9)                        |         |
| Yes                         | 372 (33.2)                            | 25 (30.1)                        |         |
| Drinking history            |                                       |                                  | 0.132   |
| No                          | 972 (86.6)                            | 67 (80.7)                        |         |
| Yes                         | 150 (13.4)                            | 16 (19.3)                        |         |
| Family history of tumor     |                                       |                                  | 0.257   |
| No                          | 834 (74.3)                            | 57 (68.7)                        |         |
| Yes                         | 288 (25.7)                            | 26 (31.3)                        |         |
| Recurrence during follow-up |                                       |                                  | 0.100   |
| No                          | 1023 (91.2)                           | 80 (96.4)                        |         |
| Yes                         | 99 (8.8)                              | 3 (3.6)                          |         |
| Lymph node metastasis       |                                       |                                  | 0.497   |
| No                          | 813 (72.5)                            | 63 (75.9)                        |         |
| Yes                         | 309 (27.5)                            | 20 (24.1)                        |         |
| Distant metastasis          |                                       |                                  | 0.020   |
| No                          | 937 (83.5)                            | 61 (73.5)                        |         |
| Yes                         | 185 (16.5)                            | 22 (26.5)                        |         |

**Supplementary Table 6: Association between clinical features and stroke in esophageal cancer patients**

| Characteristics            | Patients without stroke<br>(n = 1122) | Patients with stroke<br>(n = 83) | P value |
|----------------------------|---------------------------------------|----------------------------------|---------|
| Tumor stage                |                                       |                                  | 0.041   |
| I                          | 476 (42.4)                            | 38 (45.8)                        |         |
| II                         | 277 (24.7)                            | 13 (15.7)                        |         |
| III                        | 184 (16.4)                            | 10 (12.0)                        |         |
| IV                         | 185 (16.5)                            | 22 (26.5)                        |         |
| Tumor differentiation      |                                       |                                  | 0.168   |
| Well differentiated        | 521 (46.4)                            | 34 (41.0)                        |         |
| Moderately differentiated  | 401 (35.7)                            | 38 (45.8)                        |         |
| Poorly differentiated      | 200 (17.9)                            | 11 (13.2)                        |         |
| Treatment regimen          |                                       |                                  | 0.058   |
| Without chemo-radiotherapy | 673 (60.0)                            | 41 (49.4)                        |         |
| With chemo-radiotherapy    | 449 (40.0)                            | 42 (50.6)                        |         |

Data are presented as n (%).

**Supplementary Table 7: Association between clinical features and stroke in gastric cancer patients**

| Characteristics             | Patients without stroke (n = 804) | Patients with stroke (n = 65) | P value |
|-----------------------------|-----------------------------------|-------------------------------|---------|
| Sex                         |                                   |                               | 0.927   |
| Male                        | 602 (64.9)                        | 49 (75.4)                     |         |
| Female                      | 202 (25.1)                        | 16 (24.6)                     |         |
| Age                         |                                   |                               | 0.001   |
| ≤ 60 years                  | 357 (44.4)                        | 14 (21.5)                     |         |
| 60–75 years                 | 357 (44.4)                        | 42 (64.6)                     |         |
| ≥ 75 years                  | 90 (11.2)                         | 9 (13.9)                      |         |
| Smoking history             |                                   |                               | 0.530   |
| No                          | 513 (63.8)                        | 44 (67.7)                     |         |
| Yes                         | 291 (36.2)                        | 21 (32.3)                     |         |
| Drinking history            |                                   |                               | 0.951   |
| No                          | 678 (84.3)                        | 55 (84.6)                     |         |
| Yes                         | 126 (15.7)                        | 10 (15.4)                     |         |
| Family history of tumor     |                                   |                               | 0.981   |
| No                          | 605 (75.2)                        | 49 (75.4)                     |         |
| Yes                         | 199 (24.8)                        | 16 (24.6)                     |         |
| Recurrence during follow-up |                                   |                               | 0.825   |
| No                          | 748 (93.0)                        | 60 (92.3)                     |         |
| Yes                         | 56 (7.0)                          | 5 (7.7)                       |         |
| Lymph node metastasis       |                                   |                               | 0.196   |
| No                          | 403 (50.1)                        | 38 (58.5)                     |         |
| Yes                         | 401 (49.9)                        | 27 (41.5)                     |         |
| Distant metastasis          |                                   |                               | 0.097   |
| No                          | 784 (97.5)                        | 61 (93.8)                     |         |
| Yes                         | 20 (2.5)                          | 4 (6.2)                       |         |
| Tumor stage                 |                                   |                               | 0.186   |
| I                           | 174 (21.6)                        | 18 (27.7)                     |         |
| II                          | 308 (38.3)                        | 23 (35.4)                     |         |
| III                         | 302 (37.6)                        | 20 (30.8)                     |         |
| IV                          | 20 (2.5)                          | 4 (6.2)                       |         |
| Tumor differentiation       |                                   |                               | < 0.001 |
| Well differentiated         | 97 (12.1)                         | 22 (33.8)                     |         |
| Moderately differentiated   | 410 (51.0)                        | 35 (53.8)                     |         |
| Poorly differentiated       | 297 (36.9)                        | 8 (12.4)                      |         |
| Treatment regimen           |                                   |                               | 0.022   |
| Without chemo-radiotherapy  | 641 (79.7)                        | 44 (67.7)                     |         |
| With chemo-radiotherapy     | 163 (20.3)                        | 21 (32.3)                     |         |

Data are presented as n (%).

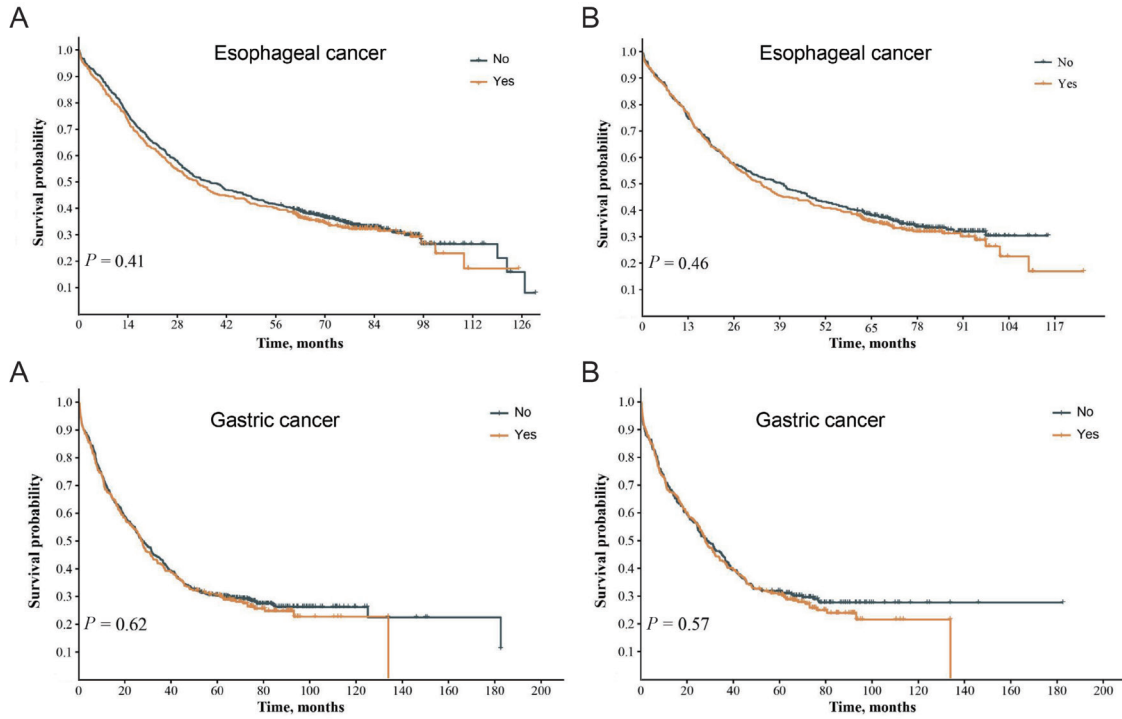

**Supplementary Figure 1: Survival time of patients with esophageal and gastric cancer with or without CVMD. Kaplan–Meier survival plots of esophageal and gastric cancer patients with or without CVMD before (A) and after matching (B). *P* values were calculated using the log-rank test. “No” refers to the group of cancer patients without CVMD, and “Yes” refers to the group of cancer patients with CVMD. CVMDs: cardiovascular and metabolic diseases.**

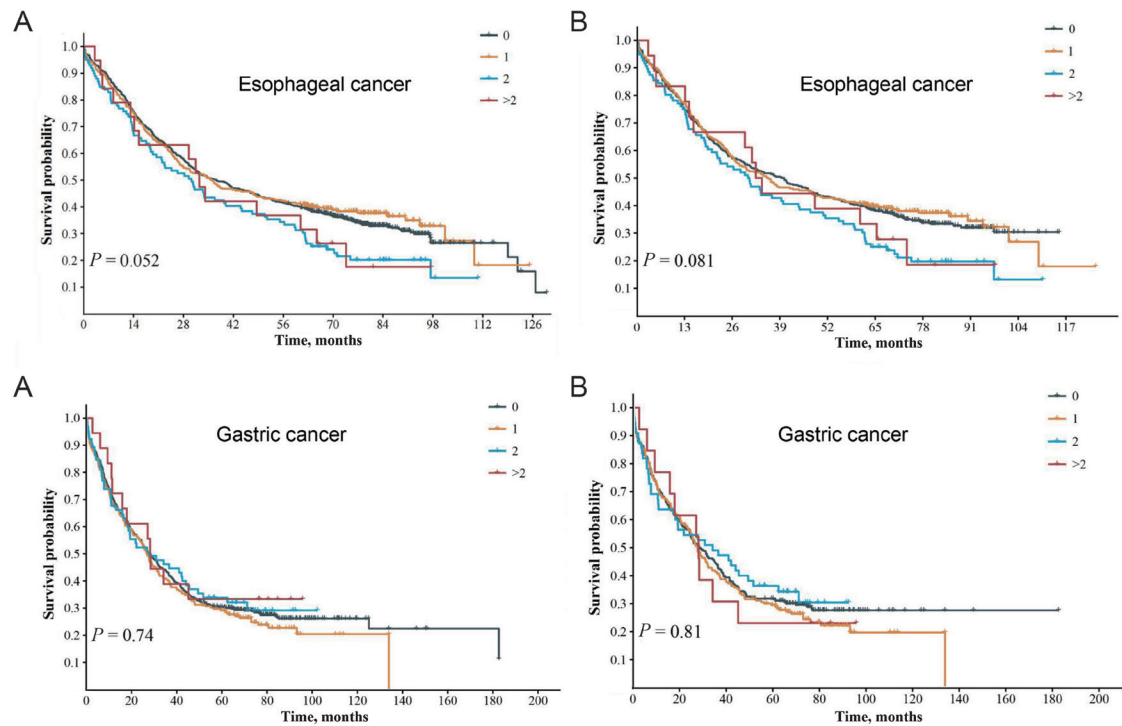

**Supplementary Figure 2. Survival time of esophageal and gastric cancer patients with various subtypes of CVMDs. Kaplan–Meier survival plots of esophageal and gastric cancer patients with various subtypes of CVMDs before (A) and after matching (B). *P* values were calculated using the log-rank test. “0” refers to the group of cancer patients without CVMD, “1” refers to the group of cancer patients with one subtype of CVMD, “2” refers to the group of cancer patients with two subtypes of CVMD, “>2” refers to the group of cancer patients with multiple subtypes of CVMD. CVMDs: cardiovascular and metabolic diseases.**

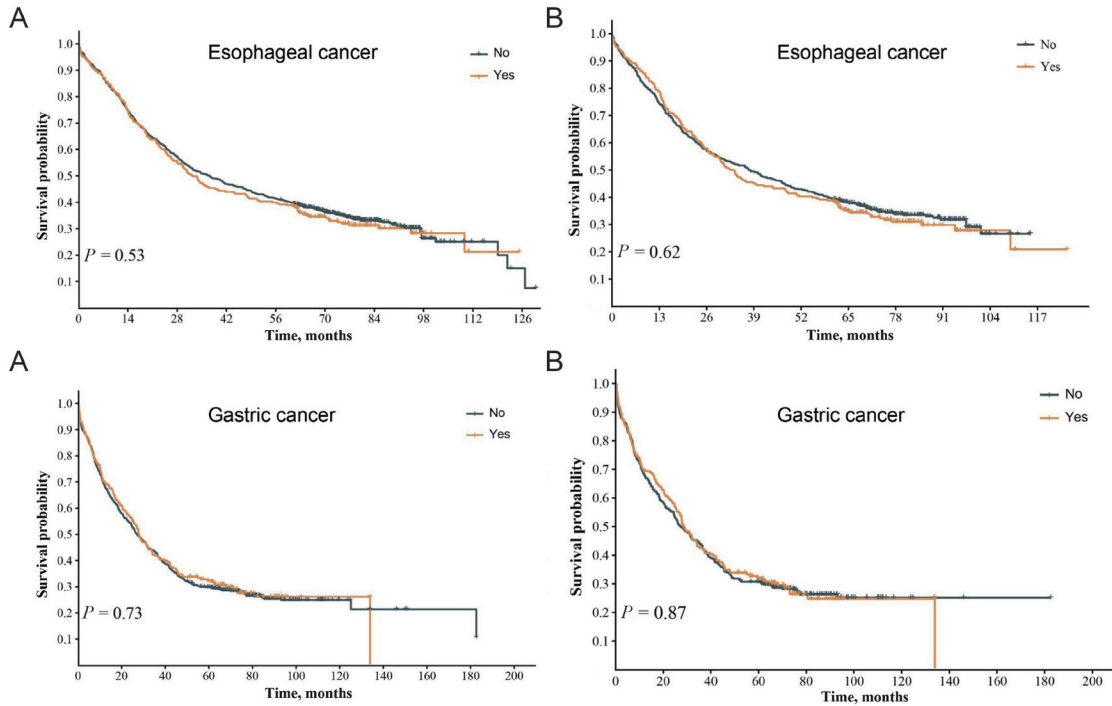

**Supplementary Figure 3: Survival time of patients with esophageal and gastric cancer with or without hypertension. Kaplan–Meier survival plots of esophageal and gastric cancer patients with or without hypertension before (A) and after matching (B). *P* values were calculated using the log-rank test. “No” refers to the group of cancer patients without hypertension, and “Yes” refers to the group of cancer patients with hypertension.**

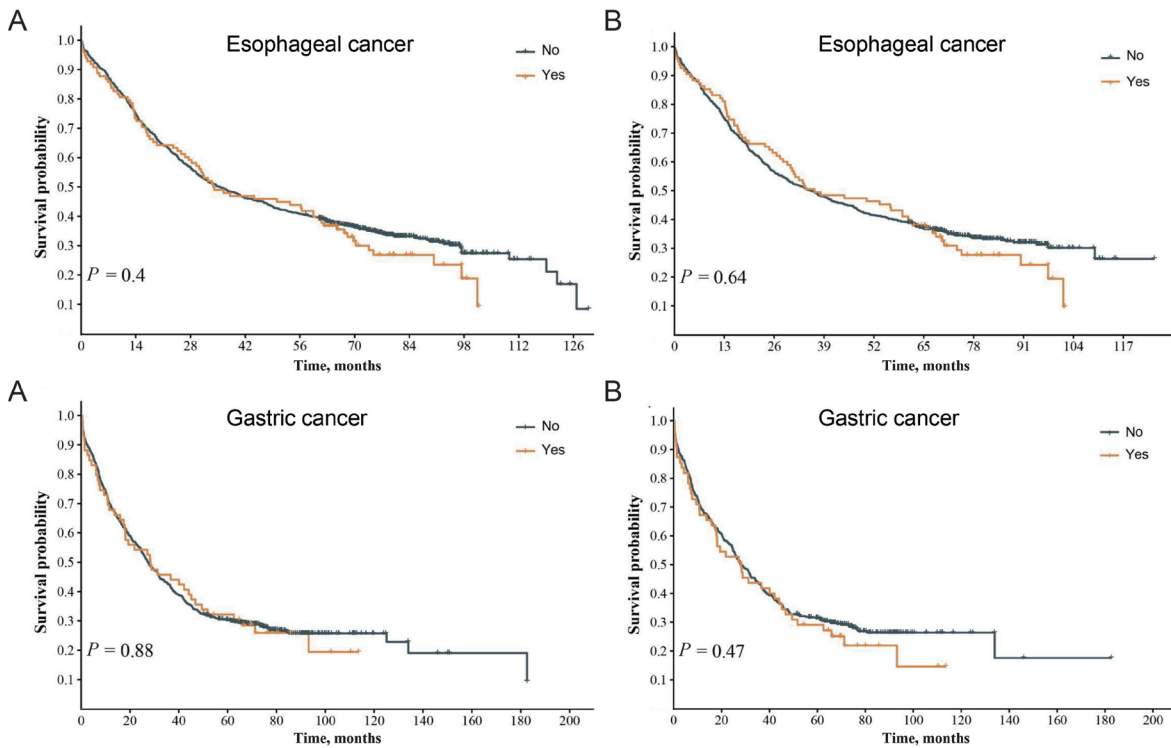

**Supplementary Figure 4: Survival time of esophageal and gastric cancer patients with or without diabetes. Kaplan–Meier survival plots of esophageal and gastric cancer patients with or without diabetes before (A) and after matching (B). *P* values were calculated using the log-rank test. “No” refers to the group of cancer patients without diabetes, and “Yes” refers to the group of cancer patients with diabetes.**

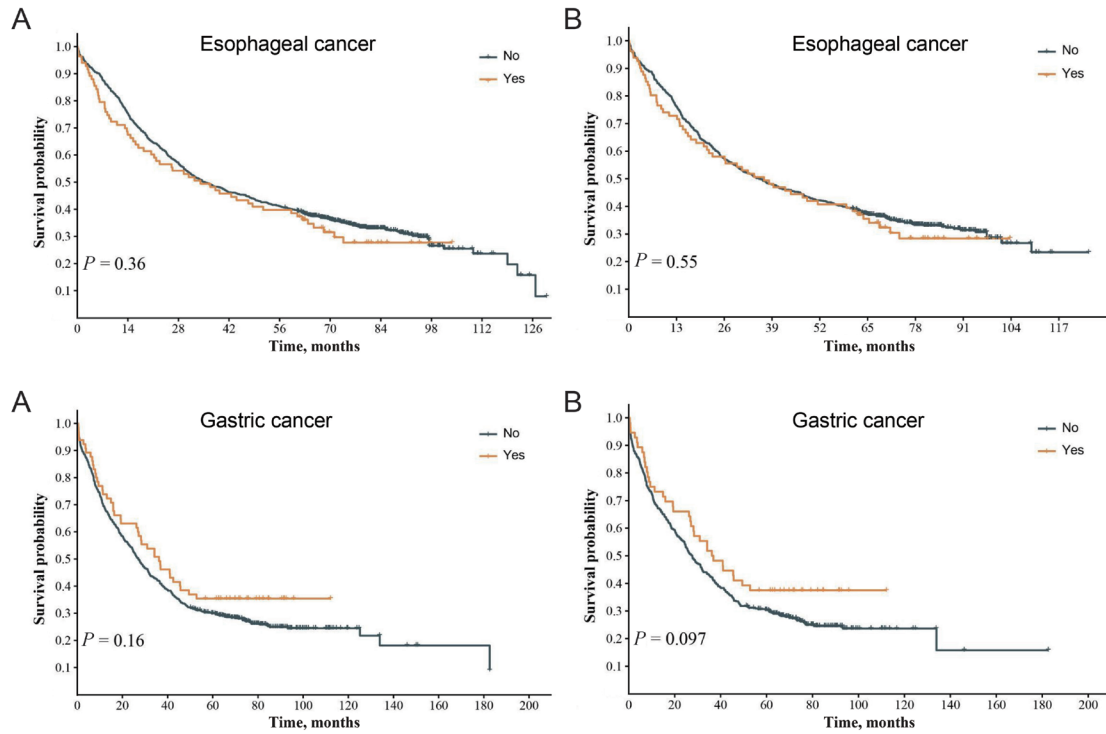

**Supplementary Figure 5: Survival time of esophageal and gastric cancer patients with or without stroke. Kaplan–Meier survival plots of esophageal and gastric cancer patients with or without stroke before (A) and after matching (B). *P* values were calculated using the log-rank test. “No” refers to the group of cancer patients without stroke, and “Yes” refers to the group of cancer patients with stroke.**
